# Supplementary material for: Development and Validation of Clinical Scoring Tool to Predict Outcomes of Treatment With Vedolizumab in Patients With Ulcerative Colitis
Source: PubMed Central journal article supplement — Clin Gastroenterol Hepatol. Author manuscript; Available in PMC 2021 Feb 22. (PMC7899124; doi:10.1016/j.cgh.2020.02.010), 2020-02-13
Supplement: NIHMS1666726-supplement-1.pdf [file NIHMS1666726-supplement-1.pdf]

## Supplementary Material and Methods

### Data Source

GEMINI 1 trial data were collected as part of the phase 3 clinical trial (NCT00783718) with corresponding ethics/institutional review board approval. The VICTORY consortium dataset was collected after ethics/institutional review board approval at all participating sites.

### Data Source: VICTORY Consortium

The VICTORY Consortium is a multicenter collaborative research group in which patient demographics, disease characteristics, and treatment outcomes are pooled for inflammatory bowel disease (IBD) patients treated with biologics. Institutional review board approval was obtained from each site for ongoing retrospective data collection and transfer. Data were collected individually by sites using a standardized data collection form and transferred (after de-identification) to the coordinating site (University of California, San Diego) for data compilation and analysis.

### Model and Clinical Decision Support Tool Sensitivity Analyses in GEMINI 1 Trial for VDZ Exposure-Efficacy Relationships

Albumin has previously been shown to be the strongest predictor of exposure-efficacy relationships for vedolizumab (VDZ) in ulcerative colitis (UC); however, albumin does not explain the entirety of VDZ exposure variability.<sup>8,9</sup> Before finalizing the model for external validation, a sensitivity analysis was performed by replacing albumin with calculated VDZ clearance profiles for GEMINI 1 trial participants.<sup>8,9</sup> Performance of this model within the GEMINI 1 trial derivation cohort was slightly better than the original model that included albumin (area under the receiver-operating characteristic curve [AUC] 0.69 vs 0.65). A baseline prediction model is not currently available for predicting VDZ exposure over time, and therefore clearance could not be readily substituted for albumin in the final prediction model. Albumin was therefore retained for external validation of the model in the VICTORY Consortium dataset.

### GEMINI 1 Trial VDZ Concentration Assessments

VDZ concentrations were assessed in the GEMINI 1 trial using serum samples with a direct VDZ capture pharmacokinetic assay. A sandwich enzyme-linked immunosorbent assay was used for quantifying VDZ in human serum. Serum concentrations of VDZ were determined by QPS in accordance with Good Laboratory Practice. The lower limit of detection was 0.125  $\mu\text{g}/\text{mL}$ .

Time points for trough concentration assessments taken 30 minutes before VDZ infusions were weeks 0, 2, 6, 22, and 46. Additional concentration assessments were taken at weeks 4, 14, 38, and 52. Time points for peak concentration assessments taken 2 hours postinfusion were weeks 0, 2, 6, 22, and 46. Differences in median concentrations at each time point across the 3 probability groups were first assessed using non-parametric testing (Kruskal-Wallis), and then pairwise comparisons were done for each group at each time point.

### GEMINI 1 Trial Fecal Calprotectin Assessments

Fecal calprotectin was assessed in the GEMINI 1 trial using the CAL0100 test kit. Time points for assessments were weeks 0, 6, 30, and 52. Differences in median concentrations at each time point across the three probability groups were first assessed using nonparametric testing (Kruskal-Wallis), and then pairwise comparisons were done for each group at each time point.

### GEMINI 1 Intention-to-Treat Sensitivity Analyses

**Intention-to-Treat Induction Analysis.** In accordance with an intent-to-treat approach, the intention-to-treat (ITT) population for the induction study consisted of all randomized patients in the GEMINI 1 trial cohort who received any amount of blinded study drug during induction treatment.

**ITT Maintenance Analysis.** In accordance with an intent-to-treat approach, the ITT population for the maintenance treatment consisted of all rerandomized patients randomized as week 6 responders who received VDZ during induction treatment and then received any amount of study drug in the maintenance phase.

### Model Validation VICTORY Consortium

External validation of the model was conducted in the VICTORY Consortium cohort. Discriminative ability was assessed by receiver-operating characteristic curve analysis and is presented as AUC. An AUC value of 0.5 denotes that the model does not discriminate any better than random guessing and 1 denotes perfect discrimination. Calibration of the model applied to the external validation cohort was evaluated in multiple ways. The observed event rates and predicted risk were graphically assessed by a calibration curve. The intercept (calibration-in-the-large) assessed whether the overall predicted event rate matches the observed rate, and should ideally be zero, indicating no systematic difference in observed predicted rates. The calibration slope gives an indication of how over- or under-fit the model is, and should ideally be 1, indicating no overfitting. A joint hypothesis test of perfect calibration using a likelihood ratio test was evaluated as an overall test of calibration. This test is

more sensitive to potential miscalibration than the Hosmer-Lemeshow goodness-of-fit test, which is also shown for comparison after splitting the sample into quintiles. This test assesses whether or not the observed event rates match expected event rates in subgroups of the model population, with  $P$  values  $<.05$  indicating evidence of poor fit for both calibration tests. The overall performance of the models was evaluated with the Nagelkerke  $R^2$  and the Brier score. Nagelkerke  $R^2$  is a measure between 0 and 1, with 0 denoting that the model does not explain any variation and 1 denoting that it perfectly explains the observed variation in outcomes. The Brier score is a measure of prediction error with the mean squared difference between the predicted probability and the actual outcome, and values range from 0 (perfect prediction) to 0.25 (a noninformative model).<sup>10</sup>

## Results

### *Variable Selection*

A binary categorization was chosen for disease duration ( $\geq 2$  years vs  $< 2$  years) because nonlinearity was observed for the association between disease duration and corticosteroid-free remission, and a binary categorization was thought to be easier to interpret and apply clinically. Previous tumor necrosis factor (TNF) antagonist exposure was used instead of previous TNF antagonist failure, given the inability to accurately classify failure subtypes in routine practice and similarity in significance between these variables. Baseline endoscopy

was used as a metric for disease activity instead of baseline stool frequency, given the subjectivity in stool frequency assessment in routine practice, the observation that the significance for stool frequency was being driven by the comparison of severe (Mayo score stool frequency 3) vs inactive (Mayo score stool frequency 0) disease, the inclusion of endoscopic disease activity as an endpoint for the model, and observed collinearity between baseline endoscopy and baseline stool frequency ( $P < .01$ ). Current or prior smoking was further investigated as individual variables instead of as a composite variable, when separating this into current smokers vs nonsmokers and prior smokers vs nonsmokers, it was found to not meet the thresholds for inclusion and was therefore excluded before the second step of model building.

### *Model Equation Example*

A 35-year-old man with UC is being considered for VDZ therapy. His UC was diagnosed 15 months prior, and he had no prior TNF antagonist exposure. Baseline endoscopy is performed and is notable for the absence of vascular pattern, marked erythema, and friability, without ulcers or spontaneous bleeding (Mayo endoscopic subscore 2). Baseline lab results are notable for an albumin of 40 g/L (4 g/dL).

$$\begin{aligned} \text{This patient's model calculation} &= \\ &- 3.7038 + [0.2820] + [0.1847] \\ &+ [0.0647 \times 40] = - 0.7464 \end{aligned}$$

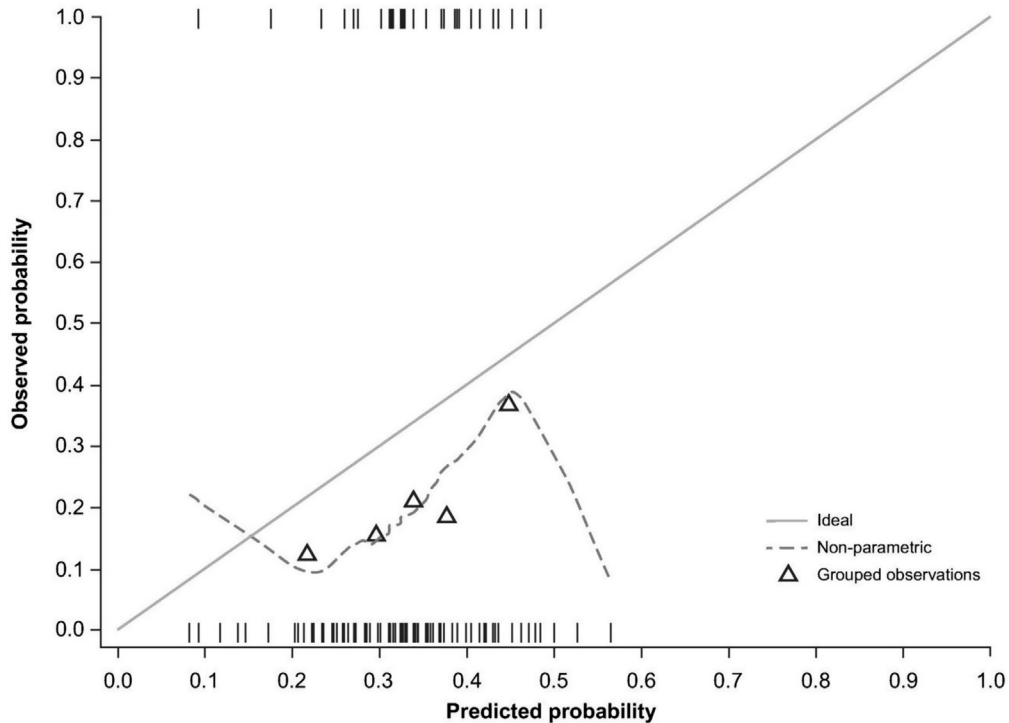

**Supplementary Figure 1.** The calibration plot compares the predicted risk for all patients to their expected risk. The ideal line (gray) shows perfect calibration (ie, predicted risk is equal to observed risk). The nonparametric line (dashed, gray) shows the risk for patients over the entire range of risks predicted by the model. The grouped observations (triangles) are the average risks within each quintile group. The calibration intercept (calibration-in-the-large) and slope were estimated from the calibration curve. The calibration-in-the-large compares the systematic difference between the average observed risk and predicted risk and should ideally be equal to 0, indicating no systematic difference. The calibration-in-the-large estimate is  $-0.674$  (95% confidence interval,  $-1.379$  to  $0.031$ ) for the current model. The calibration slope gives an indication of overfitting and should ideally be equal to 1, indicating no overfitting or underfitting. Its estimate is  $0.999$  (95% confidence interval,  $0.029$  to  $1.968$ ) for the current model. A format test of calibration can be done by a likelihood ratio test so that the intercept is 0 and slope is 1. This test confirms that the model predicts risks approximately twice as large as observed on the odds scale ( $\exp(0.674) = 1.96$ ) (likelihood ratio  $\chi^2 = 16.18$ ,  $df = 2$ ,  $P = .00031$ ), confirming model miscalibration.

**Supplementary Table 1.** Comparison of Demographics Between the VICTORY Cohorts Included in Validation

|                                      | VICTORY Consortium                                       |                                                 | <i>P</i> value |
|--------------------------------------|----------------------------------------------------------|-------------------------------------------------|----------------|
|                                      | Entire Vedolizumab-Treated Cohort (N = 352) <sup>a</sup> | Vedolizumab-Treated Validation Cohort (n = 199) |                |
| Female                               | 184 (52)                                                 | 104 (52)                                        | 1.00           |
| Smoker (never)                       | 256 (73)                                                 | 144 (72)                                        | .92            |
| Age, y                               | 41.6 ± 17.3                                              | 41.5 ± 17.3                                     | .95            |
| BMI, kg/m <sup>2</sup>               | 25.6 ± 5.77                                              | 25.3 ± 5.83                                     | .56            |
| Disease duration, y                  | 6.0 (2–12)                                               | 6.0 (2–12)                                      | 1.00           |
| Disease duration <2 y                | 54 (16)                                                  | 31 (16)                                         | 1.00           |
| No prior hospitalization             | 93 (26)                                                  | 55 (28)                                         | .77            |
| Prior TNF antagonist exposure        | 231 (66)                                                 | 135 (68)                                        | .64            |
| Prior TNF antagonist failure         | 194 (55)                                                 | 117 (59)                                        | .42            |
| Extensive baseline disease           | 210 (60)                                                 | 112 (56)                                        | .47            |
| Baseline moderate endoscopic disease | 237 (67)                                                 | 126 (63)                                        | .35            |
| Baseline albumin, g/L                | 39.1 ± 5.54                                              | 39.4 ± 5.41                                     | .54            |
| Concomitant CS only                  | 118 (34)                                                 | 69 (35)                                         | .78            |
| Concomitant IMM only                 | 50 (14)                                                  | 36 (18)                                         | .27            |
| Concomitant CS and IMMs              | 73 (21)                                                  | 49 (25)                                         | .37            |

Values are n (%), mean ± SD, or median (interquartile range).

BMI, body mass index; CS, corticosteroid; IMM, immunomodulator; TNF, tumor necrosis factor; VICTORY, Vedolizumab for Health Outcomes in Inflammatory Bowel Diseases.

<sup>a</sup>Includes patients who were ultimately excluded for lack of endoscopic follow-up.

**Supplementary Table 2.** Univariable Analyses for Corticosteroid-Free Remission After 52 Weeks of Vedolizumab in the GEMINI 1 Trial Cohort

| Baseline variable                                     | Univariable |                |
|-------------------------------------------------------|-------------|----------------|
|                                                       | Odds ratio  | <i>P</i> value |
| Age                                                   | 1.00        | .958           |
| Sex (female vs male)                                  | 1.34        | .119           |
| Ethnicity (other vs non-Hispanic/Latino)              | 0.78        | .549           |
| Race (non-white vs white)                             | 0.82        | .450           |
| Smoker (current/previous vs nonsmoker)                | 0.72        | .091           |
| Smoker (current vs nonsmoker)                         | 0.78        | .854           |
| Smoker (previous vs nonsmoker)                        | 0.71        | .413           |
| BMI                                                   | 1.03        | .046           |
| Disease duration (continuous)                         | 1.04        | .017           |
| Disease duration (≥5 y vs <5 y)                       | 1.28        | .192           |
| Disease duration (≥2 y vs <2 y)                       | 1.49        | .107           |
| EIM (no vs yes)                                       | 1.03        | .890           |
| Prior hospitalization (no vs yes)                     | 1.21        | .352           |
| Previous TNF antagonist exposure (no vs yes)          | 1.84        | .001           |
| Previous TNF antagonist failure (no vs yes)           | 1.88        | .001           |
| Concomitant corticosteroids (no vs yes)               | 0.99        | .952           |
| Concomitant immunomodulator (no vs yes)               | 0.72        | .085           |
| Baseline severe disease, full Mayo score (<10 vs ≥10) | 1.62        | .023           |
| Baseline full Mayo score                              | 0.91        | .079           |
| Baseline partial Mayo score                           | 0.94        | .246           |
| Baseline rectal bleeding Mayo score (1 vs 0)          | 1.37        | .717           |
| Baseline rectal bleeding Mayo score (2 vs 0)          | 1.70        | .292           |
| Baseline rectal bleeding Mayo score (3 vs 0)          | 1.92        | .209           |
| Baseline stool frequency Mayo score (0–2 vs 3)        | 1.70        | .005           |
| Baseline stool frequency Mayo score (1 vs 0)          | 1.52        | .010           |
| Baseline stool frequency Mayo score (2 vs 0)          | 1.25        | .409           |
| Baseline stool frequency Mayo score (3 vs 0)          | 0.75        | .015           |
| Baseline endoscopy (moderate vs severe)               | 1.57        | .016           |
| Baseline albumin                                      | 1.08        | <.001          |
| Baseline albumin (>35 g/L vs ≤35 g/L)                 | 1.88        | .002           |
| Baseline fecal calprotectin                           | 1.00        | .939           |

BMI, body mass index; EIM, extraintestinal manifestation; TNF, tumor necrosis factor.

**Supplementary Table 3.** Baseline Differences in Demographics Between Longer Disease Duration ( $\geq 2$  y) and Shorter Disease Duration ( $< 2$  y) Patients in the GEMINI 1 Cohort

| Variable                         | Short disease duration ( $< 2$ y)<br>(n = 126) | Long disease duration ( $\geq 2$ y)<br>(n = 492) |
|----------------------------------|------------------------------------------------|--------------------------------------------------|
| Age, y                           | 33 (25–51)                                     | 40 (31–49)                                       |
| Female                           | 50 (40)                                        | 205 (42)                                         |
| BMI, kg/m <sup>2</sup>           | 23 (21–27)                                     | 24 (22–28)                                       |
| Disease duration, y <sup>a</sup> | 1.2 (0.7–1.5)                                  | 6.2 (3.7–10.5)                                   |
| Prior hospitalization            | 65 (52)                                        | 145 (29)                                         |
| Baseline EIM                     | 37 (29)                                        | 177 (36)                                         |
| Previous TNF antagonist exposure | 48 (38)                                        | 263 (53)                                         |
| Previous TNF antagonist failure  | 44 (35)                                        | 222 (45)                                         |
| Concomitant CS only              | 73 (58)                                        | 252 (51)                                         |
| Concomitant IMMs only            | 41 (33)                                        | 171 (35)                                         |
| Baseline endoscopy moderate      | 63 (50)                                        | 214 (44)                                         |
| Baseline partial Mayo score      | 6 (5–7)                                        | 6 (5–7)                                          |
| Baseline calprotectin, mg/kg     | 952 (305–1800)                                 | 832 (355–1727)                                   |
| Baseline albumin, g/L            | 36 (33–41)                                     | 37 (34–40)                                       |
| VDZ maintenance q4               | 105 (83)                                       | 391 (79)                                         |

BMI, body mass index; CS, corticosteroid; EIM, extraintestinal manifestation; IMM, immunomodulator; q, quartile; TNF, tumor necrosis factor.

<sup>a</sup>2 patients had missing data for disease duration.

**Supplementary Table 4.** Differences in Median Measured VDZ Concentrations Over 52 Weeks in GEMINI 1 Trial Derivation Cohort

| Time point        | Low probability<br>( $\mu\text{g/mL}$ ) | Intermediate<br>probability ( $\mu\text{g/mL}$ ) | High probability<br>( $\mu\text{g/mL}$ ) | <i>P</i> value (overall) | <i>P</i> value<br>(low vs intermediate) | <i>P</i> Value<br>(Low vs High) | <i>P</i> Value<br>(Intermediate<br>vs High) |
|-------------------|-----------------------------------------|--------------------------------------------------|------------------------------------------|--------------------------|-----------------------------------------|---------------------------------|---------------------------------------------|
| Baseline predose  | 0                                       | 0                                                | 0                                        | —                        | —                                       | —                               | —                                           |
| Baseline postdose | 93.8 (78.7–108)                         | 92.6 (78–108)                                    | 98.3 (80.4–117)                          | .095                     | .842                                    | .103                            | .034 <sup>a</sup>                           |
| Week 2 predose    | 22.9 (17.6–29.2)                        | 27.4 (23.3–35.7)                                 | 32 (26.6–39.5)                           | <.001 <sup>a</sup>       | <.001 <sup>a</sup>                      | <.001 <sup>a</sup>              | <.001 <sup>a</sup>                          |
| Week 2 postdose   | 112 (94.9–132)                          | 115.5 (96.2–139)                                 | 129.5 (108–149.5)                        | <.001 <sup>a</sup>       | .593                                    | <.001 <sup>a</sup>              | <.001 <sup>a</sup>                          |
| Week 4            | 33.8 (25.5–45.4)                        | 42.25 (33.1–53.6)                                | 53.8 (41.4–64.5)                         | <.001 <sup>a</sup>       | <.001 <sup>a</sup>                      | <.001 <sup>a</sup>              | <.001 <sup>a</sup>                          |
| Week 6 predose    | 17.2 (10.5–25.2)                        | 23.5 (16.85–33.3)                                | 34.85 (25.9–43.6)                        | <.001 <sup>a</sup>       | <.001 <sup>a</sup>                      | <.001 <sup>a</sup>              | <.001 <sup>a</sup>                          |
| Week 6 postdose   | 108 (89.8–128)                          | 113 (93.9–136)                                   | 126 (102–150)                            | <.001 <sup>a</sup>       | .062                                    | <.001 <sup>a</sup>              | <.001 <sup>a</sup>                          |
| Week 14           | 15.7 (7.79–24.1)                        | 21.25 (12.9–32.7)                                | 29.45 (18–43.5)                          | <.001 <sup>a</sup>       | <.001 <sup>a</sup>                      | <.001 <sup>a</sup>              | <.001 <sup>a</sup>                          |
| Week 22 predose   | 17.95 (9.27–29.8)                       | 23.8 (13.5–37.55)                                | 32.45 (17.55–48.1)                       | <.001 <sup>a</sup>       | .007 <sup>a</sup>                       | <.001 <sup>a</sup>              | .004 <sup>a</sup>                           |
| Week 22 postdose  | 109 (91.55–129.5)                       | 112.5 (94.6–142)                                 | 125 (103–145)                            | .032 <sup>a</sup>        | .285                                    | .009 <sup>a</sup>               | .059                                        |
| Week 38           | 16.9 (7.59–32.7)                        | 26.3 (13.7–42.6)                                 | 29.5 (15.9–50.2)                         | .002 <sup>a</sup>        | .010 <sup>a</sup>                       | <.001 <sup>a</sup>              | .154                                        |
| Week 46 predose   | 22.5 (7.97–36.4)                        | 27.8 (13.6–42.8)                                 | 31.5 (14.1–52.3)                         | .015 <sup>a</sup>        | .069                                    | .005 <sup>a</sup>               | .104                                        |
| Week 46 postdose  | 108 (91.3–129)                          | 115 (90–143)                                     | 127 (104–153)                            | .016 <sup>a</sup>        | .368                                    | .008 <sup>a</sup>               | .023 <sup>a</sup>                           |
| Week 52           | 35.25 (19.6–60.65)                      | 43.1 (20.5–63.1)                                 | 52.25 (21.1–77.6)                        | .053                     | .498                                    | .028 <sup>a</sup>               | .050                                        |

Values are median (interquartile range). All postdose assessments were done 2 hours postdose.

VDZ, vedolizumab.

<sup>a</sup>Closed test procedure used to control for type I error.

**Supplementary Table 5.** Differences in Partial Mayo Score Over 52 Weeks in GEMINI 1 Trial Derivation Cohort

| Time point | Low probability; mean change from baseline (interquartile range) | Intermediate probability; mean change from baseline (interquartile range) | High probability; mean change from baseline (interquartile range) | P value            |                               |                       |                   |
|------------|------------------------------------------------------------------|---------------------------------------------------------------------------|-------------------------------------------------------------------|--------------------|-------------------------------|-----------------------|-------------------|
|            |                                                                  |                                                                           |                                                                   | P value (overall)  | P value (low vs intermediate) | P value (low vs high) |                   |
| Baseline   | 0                                                                | 0                                                                         | 0                                                                 | —                  | —                             | —                     |                   |
| Week 2     | -0.67 (-1.0 to 0.0)                                              | -0.98 (-2.0 to 0.0)                                                       | -1.11 (-2.0 to 0.0)                                               | .003 <sup>a</sup>  | .007 <sup>a</sup>             | .001 <sup>a</sup>     | .230              |
| Week 4     | -1.18 (-2.0 to 0.0)                                              | -1.71 (-3.0 to 0.0)                                                       | -1.91 (-3.0 to 0.0)                                               | <.001 <sup>a</sup> | .001 <sup>a</sup>             | <.001 <sup>a</sup>    | .134              |
| Week 6     | -1.38 (-2.0 to 0.0)                                              | -1.88 (-3.0 to 0.0)                                                       | -2.08 (-3.0 to -1.0)                                              | <.001 <sup>a</sup> | .002 <sup>a</sup>             | <.001 <sup>a</sup>    | .135              |
| Week 10    | -1.81 (-3.0 to 0.0)                                              | -2.31 (-4.0 to 0.0)                                                       | -2.73 (-4.0 to -1.0)                                              | <.001 <sup>a</sup> | .007 <sup>a</sup>             | <.001 <sup>a</sup>    | .021 <sup>a</sup> |
| Week 14    | -2.19 (-4.0 to -1.0)                                             | -2.51 (-4.0 to -1.0)                                                      | -3.06 (-4.0 to -2.0)                                              | <.001 <sup>a</sup> | .027 <sup>a</sup>             | <.001 <sup>a</sup>    | .003 <sup>a</sup> |
| Week 18    | -2.44 (-4.0 to -1.0)                                             | -2.74 (-4.0 to -1.0)                                                      | -3.23 (-5.0 to -2.0)                                              | <.001 <sup>a</sup> | .050                          | <.001 <sup>a</sup>    | .005 <sup>a</sup> |
| Week 22    | -3.04 (-4.0 to -1.0)                                             | -3.16 (-5.0 to -1.0)                                                      | -3.55 (-5.0 to -2.0)                                              | .003 <sup>a</sup>  | .064                          | <.001 <sup>a</sup>    | .028 <sup>a</sup> |
| Week 26    | -3.15 (-5.0 to -2.0)                                             | -3.45 (-5.0 to -2.0)                                                      | -3.77 (-5.0 to -2.0)                                              | .002 <sup>a</sup>  | .030 <sup>a</sup>             | <.001 <sup>a</sup>    | .055              |
| Week 30    | -3.29 (-5.0 to -1.0)                                             | -3.75 (-6.0 to -2.0)                                                      | -3.75 (-5.0 to -3.0)                                              | .004 <sup>a</sup>  | .004 <sup>a</sup>             | .002 <sup>a</sup>     | .509              |
| Week 34    | -3.26 (-5.0 to -1.0)                                             | -4.06 (-6.0 to -2.0)                                                      | -3.77 (-5.0 to -2.0)                                              | <.001 <sup>a</sup> | <.001 <sup>a</sup>            | <.001 <sup>a</sup>    | .805              |
| Week 38    | -3.52 (-5.0 to -2.0)                                             | -4.22 (-6.0 to -3.0)                                                      | -3.95 (-6.0 to -3.0)                                              | .002 <sup>a</sup>  | <.001 <sup>a</sup>            | .004 <sup>a</sup>     | .732              |
| Week 42    | -3.74 (-5.0 to -2.0)                                             | -4.28 (-6.0 to -3.0)                                                      | -4.16 (-6.0 to -3.0)                                              | .015 <sup>a</sup>  | .006 <sup>a</sup>             | .010 <sup>a</sup>     | .937              |
| Week 46    | -3.92 (-5.0 to -2.0)                                             | -4.30 (-6.0 to -3.0)                                                      | -4.14 (-6.0 to -3.0)                                              | .074               | .037 <sup>a</sup>             | .035 <sup>a</sup>     | .812              |
| Week 50    | -3.94 (-5.0 to -2.0)                                             | -4.45 (-6.0 to -3.0)                                                      | -4.18 (-6.0 to -3.0)                                              | .145               | .056                          | .098                  | .853              |
| Week 52    | -3.88 (-6.0 to -2.0)                                             | -4.44 (-6.0 to -3.0)                                                      | -4.17 (-6.0 to -3.0)                                              | .029 <sup>a</sup>  | .009 <sup>a</sup>             | .031 <sup>a</sup>     | .702              |

<sup>a</sup>Closed test procedure used to control for type I error.

**Supplementary Table 6.** Model Performance in GEMINI 1 Trial Derivation Cohort

| Cutoff    | Sensitivity (95% CI) (%) | Specificity (95% CI) (%) | PPV (95% CI)     | NPV (95% CI)     | Positive LR (95% CI) | Negative LR (95% CI) |
|-----------|--------------------------|--------------------------|------------------|------------------|----------------------|----------------------|
| 26 points | 87.5 (81.8–91.9)         | 28.1 (23.9–32.6)         | 34.0 (29.8–38.5) | 84.1 (77.2–89.7) | 1.22 (1.12–1.32)     | 0.44 (0.29–0.67)     |
| 32 points | 34.2 (27.4–41.6)         | 82.5 (78.6–85.9)         | 45.3 (36.9–54.0) | 74.7 (70.6–78.6) | 1.96 (1.47–2.60)     | 0.80 (0.71–0.89)     |

Area under the receiver-operating characteristic curve 0.65, Brier score 0.18, Nagelkerke R-square 0.07, Hosmer-Lemeshow goodness-of-fit P value = .46. CI, confidence interval; LR, likelihood ratio; NPV, negative predictive value; PPV, positive predictive value.

**Supplementary Table 7.** Anti-TNF–Treated UC Patients

|                                      | Anti-TNF Cohort<br>(n = 123) |
|--------------------------------------|------------------------------|
| Female                               | 57 (46)                      |
| Smoker (never)                       | 85 (69)                      |
| Age, y                               | 37.7 ± 15.7                  |
| Body mass index, kg/m <sup>2</sup>   | 25.4 ± 7.8                   |
| Disease duration, y                  | 3 (1–9)                      |
| Disease duration <2 y                | 84 (68)                      |
| Prior hospitalization                | 72 (58)                      |
| Prior TNF antagonist exposure        | 41 (33)                      |
| Prior TNF antagonist failure         | 27 (22)                      |
| Extensive baseline disease           | 83 (68)                      |
| Baseline moderate endoscopic disease | 54 (44)                      |
| Baseline albumin, g/L                | 3.6 ± 0.6                    |

Values are n (%), mean ± SD, or median (interquartile range).

TNF, tumor necrosis factor; UC, ulcerative colitis.
